# Supplementary material
Source: PubMed Central journal article supplement (PMC3838257)
Supplement: JVI.02388-13_zjv999098438so1.pdf [file JVI.02388-13_zjv999098438so1.pdf]

# Comprehensive analysis of human endogenous retrovirus group HERV-W locus transcription in multiple sclerosis brain lesions by high throughput amplicon sequencing

Katja Schmitt<sup>a</sup>, Christin Richter<sup>a</sup>, Christina Backes<sup>a</sup>,  
Eckart Meese<sup>a</sup>, Klemens Ruprecht<sup>b</sup>, Jens Mayer<sup>a</sup>

<sup>a</sup>Institute of Human Genetics, Center of Human and Molecular Biology, Medical Faculty,  
University of Saarland, 66421 Homburg/Saar, Germany

<sup>b</sup>Department of Neurology, Charité - Universitätsmedizin Berlin, Germany

## Supplemental file 1

Supplemental Table S1

Summary of filtering and assignment of 454/FLX sequence reads

Supplemental Table S2

Summary of filtering and assignment of Illumina/MiSeq sequence reads

Supplemental Figure S1

Location of 5'*env* and 3'*env* amplicons within the HERV-W *env* gene region

Supplemental Figure S2

Structure of HERV-W loci identified as transcribed in this study

**Supplemental Table S1 – Summary of filtering and assignment of 454/FLX sequence reads\***

|                                        |  | 5'env |       |       |       |       |       |       |       |       |       |       |       |       |       |  |  |
|----------------------------------------|--|-------|-------|-------|-------|-------|-------|-------|-------|-------|-------|-------|-------|-------|-------|--|--|
|                                        |  | MS1   | MS2   | MS3   | MS4   | MS5   | MS6   | MS7   | H1    | H2    | H3    | H4    | H5    | H6    | H7    |  |  |
|                                        |  | #     | %     | #     | %     | #     | %     | #     | %     | #     | %     | #     | %     | #     | %     |  |  |
| total # of reads                       |  | 4297  | 2208  | 4304  | 2203  | 2116  | 1011  | 4010  | 5726  | 1622  | 1979  | 736   | 897   | 494   | 626   |  |  |
| average read length [bp]               |  | 238.5 | 245.4 | 239.0 | 215.6 | 225.3 | 216.1 | 215.1 | 242.0 | 242.4 | 241.2 | 236.3 | 236.5 | 236.4 | 236.8 |  |  |
| # of sequencing artefacts filtered     |  | 155   | 50    | 111   | 69    | 45    | 27    | 144   | 114   | 42    | 74    | 13    | 13    | 8     | 6     |  |  |
| number of reads with x mismatches      |  | #     | %     | #     | %     | #     | %     | #     | %     | #     | %     | #     | %     | #     | %     |  |  |
| 0                                      |  | 3104  | 74.94 | 1606  | 74.42 | 2755  | 65.70 | 1596  | 78.58 | 1555  | 77.21 | 681   | 72.30 | 2665  | 71.99 |  |  |
| 1                                      |  | 799   | 19.29 | 432   | 20.02 | 998   | 23.80 | 293   | 14.43 | 257   | 12.76 | 120   | 12.74 | 597   | 16.13 |  |  |
| 2                                      |  | 181   | 4.37  | 97    | 4.50  | 346   | 8.25  | 84    | 4.12  | 151   | 7.50  | 104   | 11.04 | 305   | 8.24  |  |  |
| 3                                      |  | 39    | 0.94  | 21    | 0.97  | 75    | 1.79  | 32    | 1.58  | 25    | 1.24  | 23    | 2.44  | 70    | 1.89  |  |  |
| 4                                      |  | 16    | 0.39  | 1     | 0.05  | 16    | 0.38  | 14    | 0.69  | 22    | 1.10  | 4     | 0.42  | 42    | 1.13  |  |  |
| 5                                      |  | 3     | 0.07  | 0     | 0.00  | 3     | 0.07  | 7     | 0.34  | 4     | 0.20  | 5     | 0.53  | 14    | 0.38  |  |  |
| >5                                     |  | 0     | 0.00  | 1     | 0.05  | 0     | 0.00  | 5     | 0.25  | 9     | 0.44  | 10    | 1.08  | 9     | 0.24  |  |  |
| sum                                    |  | 4142  | 2158  | 4193  | 2031  | 2014  | 942   | 3702  | 5612  | 1580  | 1905  | 708   | 864   | 480   | 601   |  |  |
| reads >3 mismatches filtered           |  | 19    | 2     | 19    | 26    | 26    | 14    | 65    | 40    | 4     | 3     | 13    | 16    | 4     | 10    |  |  |
| reads contributing to further analysis |  | 4123  | 2156  | 4174  | 2108  | 2045  | 970   | 3801  | 5572  | 1576  | 1902  | 710   | 868   | 482   | 610   |  |  |
|                                        |  | 3'env |       |       |       |       |       |       |       |       |       |       |       |       |       |  |  |
|                                        |  | MS1   | MS2   | MS3   | MS4   | MS5   | MS6   | MS7   | H1    | H2    | H3    | H4    | H5    | H6    | H7    |  |  |
|                                        |  | #     | %     | #     | %     | #     | %     | #     | %     | #     | %     | #     | %     | #     | %     |  |  |
| total # of reads                       |  | 1712  | 3077  | 6547  | 1741  | 2470  | 2169  | 2201  | 1989  | 2096  | 2288  | 754   | 680   | 786   | 950   |  |  |
| average read length [bp]               |  | 233.1 | 237.1 | 232.9 | 150.6 | 162.5 | 149.5 | 154.7 | 238.8 | 233.1 | 236.6 | 155.6 | 165.9 | 167.0 | 148.4 |  |  |
| # of sequencing artefacts filtered     |  | 52    | 100   | 97    | 639   | 575   | 713   | 665   | 28    | 44    | 96    | 232   | 170   | 171   | 309   |  |  |
| number of reads with x mismatches      |  | #     | %     | #     | %     | #     | %     | #     | %     | #     | %     | #     | %     | #     | %     |  |  |
| 0                                      |  | 991   | 23.93 | 1853  | 85.87 | 3939  | 93.94 | 632   | 59.74 | 1327  | 73.49 | 1133  | 83.99 | 916   | 63.79 |  |  |
| 1                                      |  | 495   | 11.95 | 743   | 34.43 | 1860  | 44.36 | 308   | 29.11 | 391   | 21.65 | 162   | 12.01 | 348   | 24.23 |  |  |
| 2                                      |  | 138   | 3.33  | 297   | 13.76 | 500   | 11.93 | 71    | 6.71  | 70    | 3.88  | 39    | 2.89  | 88    | 6.13  |  |  |
| 3                                      |  | 25    | 0.64  | 65    | 3.01  | 98    | 2.34  | 28    | 2.65  | 17    | 0.94  | 10    | 0.74  | 53    | 3.69  |  |  |
| 4                                      |  | 7     | 0.17  | 16    | 0.74  | 34    | 0.81  | 14    | 1.32  | 0     | 0.00  | 4     | 0.30  | 28    | 1.95  |  |  |
| 5                                      |  | 3     | 0.07  | 1     | 0.05  | 10    | 0.24  | 4     | 0.38  | 1     | 0.06  | 1     | 0.07  | 2     | 0.14  |  |  |
| >5                                     |  | 1     | 0.02  | 2     | 0.09  | 9     | 0.21  | 1     | 0.09  | 1     | 0.06  | 0     | 0.00  | 1     | 0.07  |  |  |
| sum                                    |  | 1660  | 2977  | 6450  | 1058  | 1806  | 1349  | 1436  | 1961  | 2052  | 2192  | 500   | 485   | 583   | 608   |  |  |
| reads >3 mismatches filtered           |  | 11    | 19    | 53    | 19    | 1     | 5     | 31    | 13    | 8     | 10    | 0     | 0     | 4     | 2     |  |  |
| reads contributing to further analysis |  | 1649  | 2958  | 6397  | 1083  | 1894  | 1451  | 1505  | 1948  | 2044  | 2182  | 522   | 510   | 611   | 639   |  |  |

\*Results are given for the various brain tissue samples and the 5'env (top) and the 3'env (bottom) amplicons. Starting from a total number of reads, sequences were filtered for sequencing artifacts and then BLAT searched against the hg18 human genome reference sequence. Numbers of sequences with 0 to >5 mismatches to the best matching HERV-W locus sequence are given. Sequences with >3 mismatches were excluded from the analysis. The resulting total number of sequences used for depicting transcription patterns of HERV-W loci is given at the bottom each. Note the somewhat lower number of sequence reads from samples H4–H7.

**Supplemental Table S2 – Summary of filtering and assignment of Illumina/MiSeq sequence reads\***

|                                                              | H4            | H5            | H6            | H7            | MS4           | MS5           | MS6            | MS7           |
|--------------------------------------------------------------|---------------|---------------|---------------|---------------|---------------|---------------|----------------|---------------|
| total # of reads                                             | 1134146       | 877248        | 1028010       | 1124659       | 1171497       | 963202        | 1453740        | 760466        |
| >1 best match or match <185 bp                               | 107212        | 81021         | 77806         | 119896        | 115276        | 80011         | 83238          | 67669         |
| unambiguous                                                  | 1026934       | 796227        | 950204        | 1004763       | 1056221       | 883191        | 1370502        | 692797        |
| in %                                                         | 90.55         | 90.76         | 92.43         | 89.34         | 90.16         | 91.69         | 94.27          | 91.10         |
| number of reads with x mismatches                            |               |               |               |               |               |               |                |               |
| 0                                                            | 337277        | 287659        | 373024        | 376830        | 382577        | 338915        | 469821         | 230189        |
| 1                                                            | 236466        | 185520        | 236888        | 268266        | 269981        | 225526        | 308496         | 182478        |
| 2                                                            | 131043        | 97960         | 116222        | 129837        | 141457        | 113209        | 170553         | 102415        |
| 3                                                            | 79721         | 56578         | 63798         | 67121         | 77828         | 61625         | 100496         | 54668         |
| 4                                                            | 53489         | 37318         | 39965         | 41188         | 48244         | 37754         | 65272          | 33087         |
| 5                                                            | 46459         | 76784         | 30464         | 29512         | 33818         | 28029         | 49367          | 22755         |
| >5                                                           | 142479        | 99408         | 89843         | 92009         | 102316        | 78133         | 206497         | 67205         |
| discarded reads >3 mismatches in %                           | 23.61         | 25.38         | 16.87         | 16.19         | 17.46         | 16.30         | 23.43          | 17.76         |
| reads contributing to further analysis                       | 784507        | 627717        | 789932        | 842054        | 871843        | 739275        | 1049366        | 569750        |
| annotated as HERV17-int and contributing to further analysis | <b>778893</b> | <b>621236</b> | <b>785625</b> | <b>836399</b> | <b>865593</b> | <b>710593</b> | <b>1044013</b> | <b>565905</b> |
| in %                                                         | 68.68         | 70.82         | 76.42         | 74.37         | 73.89         | 73.77         | 71.82          | 74.42         |

\*Four MS lesions and healthy brain tissue samples each were also examined by Illumina/MiSeq sequencing technology. The total number of reads per sample is given. Reads were all 251bp in length due to the sequencing strategy. Sequences displaying more than one best match or a match length <185bp in BLAT analysis were removed from the analysis. Numbers of sequences with 0 to >5 mismatches to the best matching HERV-W locus are summarized. Note that a larger relative number of sequence reads was discarded compared to the 454/FLX dataset, yet, the total number of reads used for depicting HERV-W locus transcription patterns was nevertheless was higher. Also note that the much higher number of sequence reads also produced some non-HERV-W sequences that were identified and excluded from the analysis.

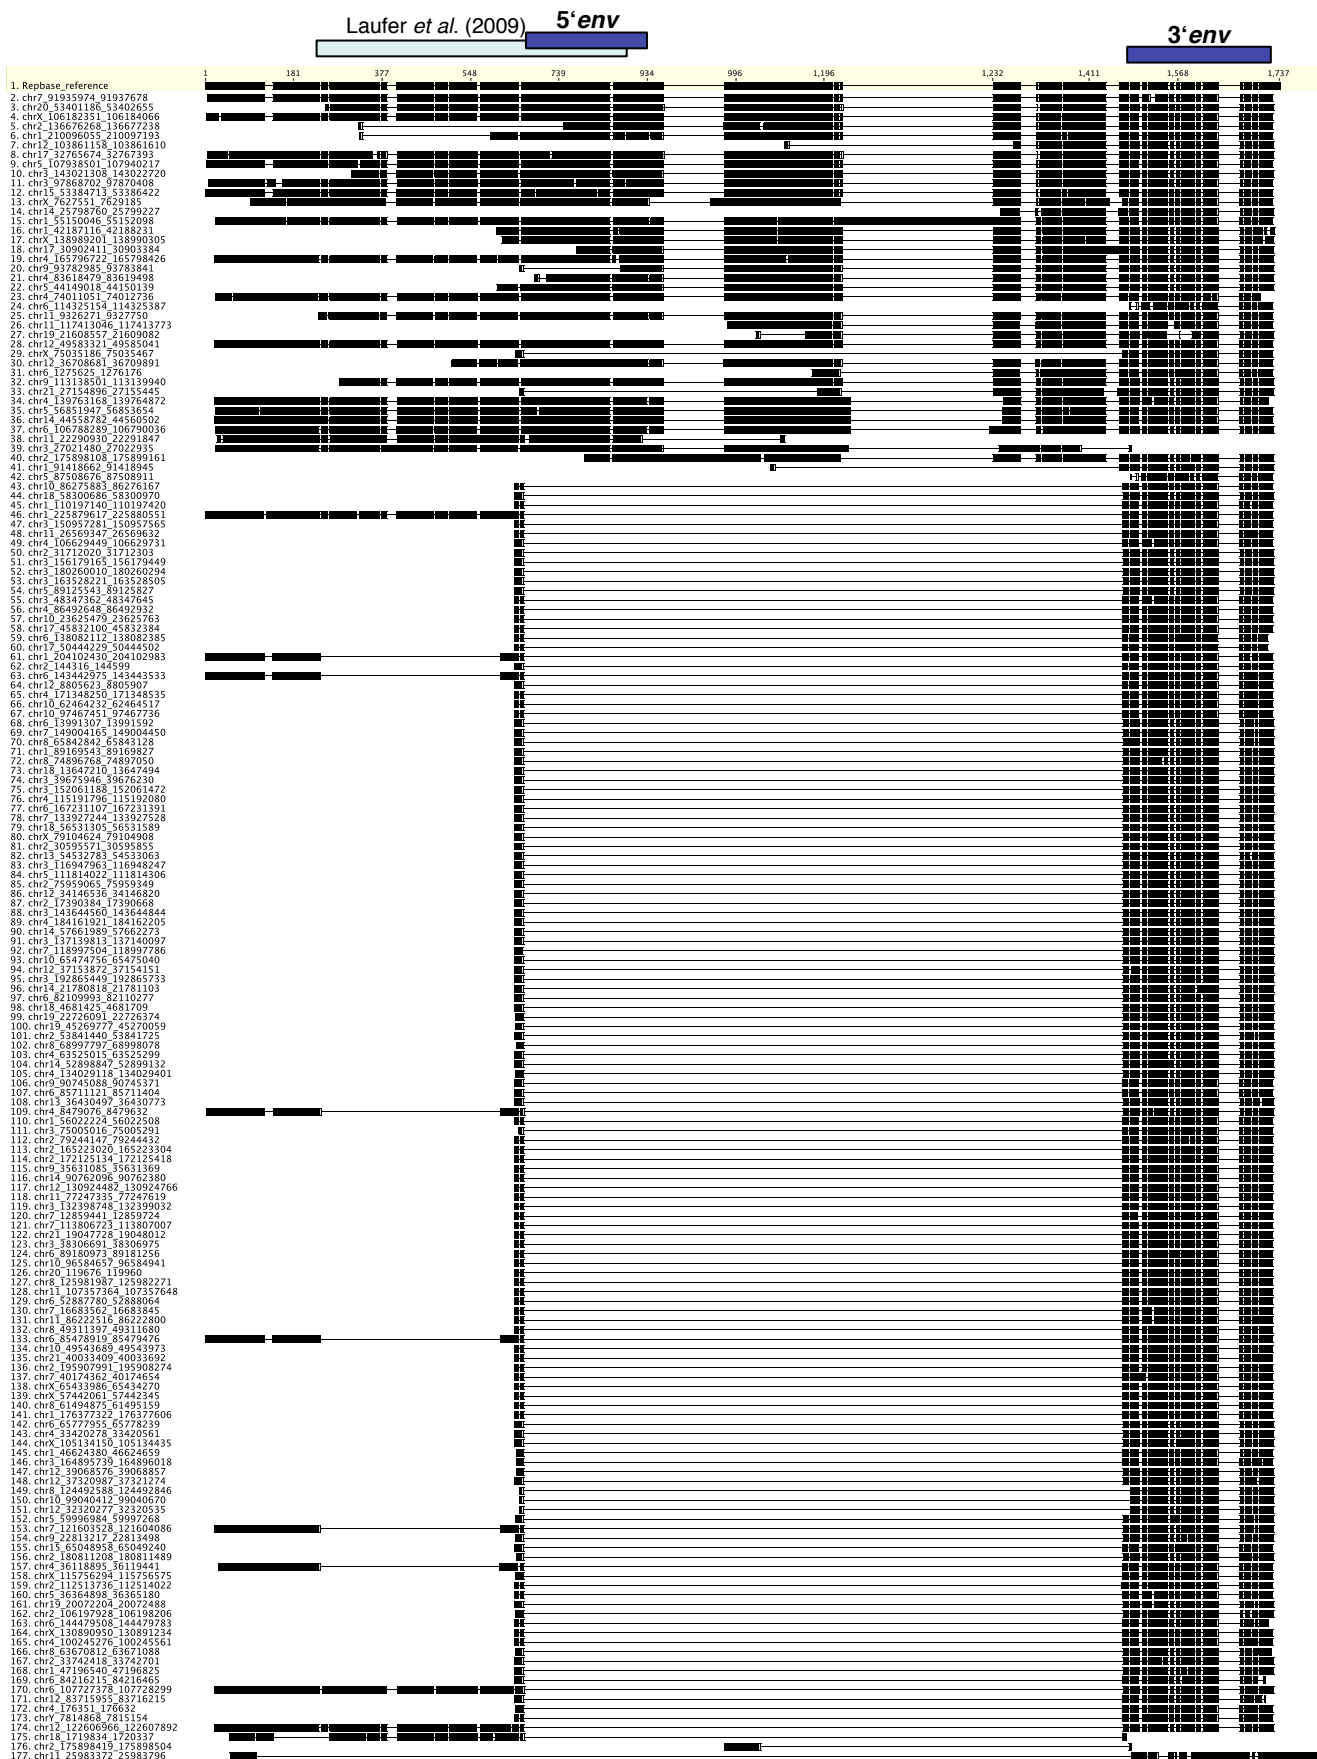

**Supplemental Figure S1 – Location of 5'env and 3'env amplicons within the HERV-W env gene region.** Depicted here is a multiple alignment of the env gene region of various HERV-W loci. Chromosomal positions of multiply aligned sequences are given on the left. Alignable regions are depicted as black boxes, gaps are indicated by horizontal lines. Location of an RT-PCR amplicon previously employed in Laufer et al. (2009) is also indicated. Note that a greater number of HERV-W loci uniformly lack an env gene region, yet those loci can be detected by the 3'env amplicon.

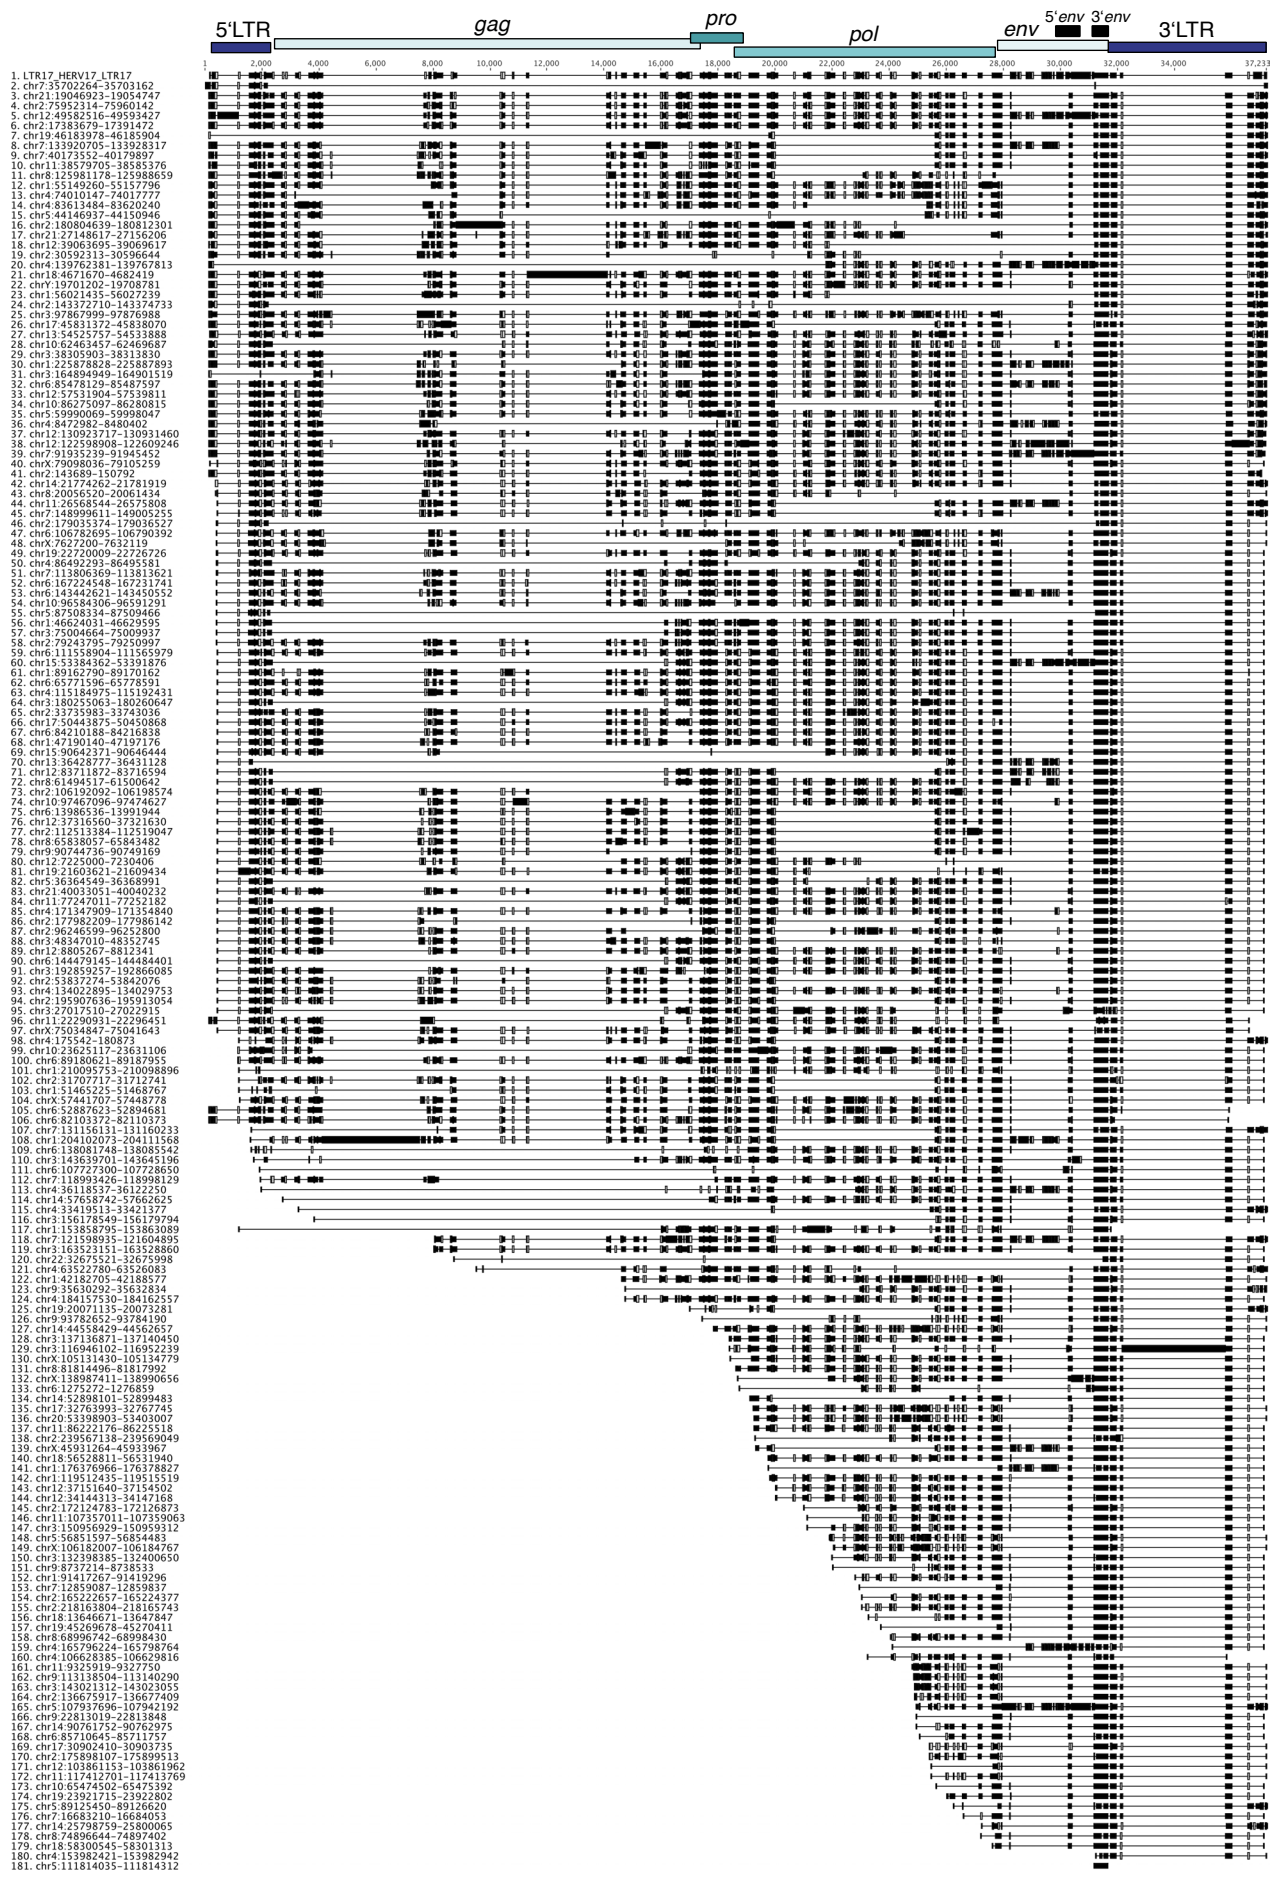

**Supplemental Figure S2 – Structure of HERV-W loci identified as transcribed in this study.** Depicted is a multiple alignment of sequences of complete HERV-W loci identified as transcribed in our study. Location of HERV-W 5' and 3'LTR and proviral gene regions are indicated on the top. Alignable regions are depicted as black boxes, gaps are indicated by horizontal lines. Location of 5'env and 3'env amplicons employed in this study is also indicated.
